# Supplementary material
Source: publisher figshare collection journal article supplement (https://frontiersin.figshare.com/ndownloader/files/13649159)
Supplement: Supplementary file 1 [file 13649159]

## Sheet: Sheet1
Supplementary table 2
Photosynthetic parameter		ANOVA						Holm-Sidak comparisons
	Source of Variation	DF	SS	MS	F	P		Comparison	Diff of Means	t	P
a	Shore height	1	2.28e-06	2.28e-06	10.422	0.007		Canopy vs. Intact	0.000483	1.792	0.267
	Treatment	2	9.34e-07	4.67e-07	2.14	0.16		Subcanopy vs. Intact	0.000483	1.792	0.187
	Shore height x Treatment	2	5.21e-07	2.61e-07	1.193	0.337		Canopy vs. Subcanopy	0	0	1
	Residual	12	2.62e-06	2.18e-07
	Total	17	6.35e-06	3.74e-07
Pm	Shore height	1	0.616	0.616	39.917	<0.001		Intact vs. Subcanopy	0.717	9.992	<0.001
	Treatment	2	1.55	0.775	50.222	<0.001		Intact vs. Canopy	0.407	5.67	<0.001
	Shore height x Treatment	2	0.0537	0.0269	1.741	0.217		Canopy vs. Subcanopy	0.31	4.322	<0.001
	Residual	12	0.185	0.0154
	Total	17	2.405	0.141
Ec	Shore height	1	18.402	18.402	0.144	0.711		Intact vs. Canopy	22.717	3.478	0.014
	Treatment	2	1551.44	775.721	6.061	0.015		Intact vs. Subcanopy	12.267	1.878	0.163
	Shore height x Treatment	2	71.248	35.624	0.278	0.762		Subcanopy vs. Canopy	10.45	1.6	0.136
	Residual	12	1535.87	127.989
	Total	17	3176.96	186.88
R	Shore height	1	0.0105	0.0105	31.672	<0.001		Intact vs. Canopy	0.0277	2.636	0.064
	Treatment	2	0.0025	0.00125	3.786	0.053		Subcanopy vs. Canopy	0.021	2.001	0.132
	Shore height x Treatment	2	0.00148	0.000738	2.232	0.15		Intact vs. Subcanopy	0.00667	0.635	0.537
	Residual	12	0.00396	0.00033
	Total	17	0.0184	0.00108
